# Supplementary material
Source: Royal Society of Chemistry journal article supplement (doi:10.1039/d5gc07016c)
Supplement: d5gc07016c1.pdf [file d5gc07016c1.pdf]

## **Ethylene production from shale gas using a dielectric barrier discharge plasma reactor: an integrative circular economy perspective**

**Seojin Shin<sup>a,1</sup>, Kyeongjun Seo<sup>b,1</sup>, Seung-Jun Baek<sup>c</sup>, Kyoung-Su Ha<sup>d,\*</sup>, Wangyun Won<sup>a,\*</sup>**

- <sup>a</sup> Department of Chemical and Biological Engineering, Korea University, 145 Anam-ro, Seongbuk-gu, Seoul 02841, Republic of Korea
  - <sup>b</sup> Department of Chemical Engineering and Biotechnology, Tech University of Korea, 237 Sangdaehak-ro, Siheung-si, Gyeonggi-do 15073, Republic of Korea
  - <sup>c</sup> Chemical Process Solution Research Center, Korea Research Institute of Chemical Technology, 141 Gajeong-ro, Daejeon 34114, Republic of Korea
  - <sup>d</sup> Department of Chemical and Biomolecular Engineering, Sogang University, 35 Baekbeom-ro, Mapo-gu, Seoul 04107, Republic of Korea
- \* Corresponding authors (E-mail: philoseus@sogang.ac.kr (K.-S. Ha), wwon@korea.ac.kr (W. Won))
- <sup>1</sup> Equally contributed

### **Supplementary Material**

## A. Experimental basis for kinetic model development

Table S1. Experimental outlet compositions used for lumped kinetic model development.

| Run | Voltage [kV] | Frequency [kHz] | Discharge Power [W] | CH <sub>4</sub> Inflow [sccm] | H <sub>2</sub> | CH <sub>4</sub> | C <sub>2</sub> H <sub>6</sub> | C <sub>2</sub> H <sub>4</sub> | C <sub>2</sub> H <sub>2</sub> | C <sub>3</sub> H <sub>8</sub> | C <sub>3</sub> H <sub>6</sub> | C <sub>4</sub> H <sub>10</sub> | C <sub>5</sub> H <sub>12</sub> | C     |
|-----|--------------|-----------------|---------------------|-------------------------------|----------------|-----------------|-------------------------------|-------------------------------|-------------------------------|-------------------------------|-------------------------------|--------------------------------|--------------------------------|-------|
| 0   | 15           | 1               | 37                  | 30                            | 9.804          | 84.304          | 2.551                         | 0.174                         | 0.142                         | 0.768                         | 0.043                         | 0.124                          | 0.131                          | 1.96  |
| 1   | 15           | 1               | 37                  | 50                            | 6.437          | 89.628          | 1.836                         | 0.149                         | 0.119                         | 0.525                         | 0.031                         | 0.078                          | 0.087                          | 1.108 |
| 2   | 15           | 1               | 37                  | 70                            | 4.774          | 92.291          | 1.399                         | 0.133                         | 0.101                         | 0.382                         | 0.025                         | 0.053                          | 0.062                          | 0.781 |
| 3   | 15           | 1               | 37                  | 90                            | 3.774          | 93.898          | 1.122                         | 0.121                         | 0.088                         | 0.295                         | 0.02                          | 0.039                          | 0.047                          | 0.597 |

Table S2. Lumped reaction network and kinetic constants obtained for the DBD methane conversion model.

| Run | Reaction                                                                                            | Rate Expression                                      | Rate Constant   | Value (mol/s/bar <sup>n</sup> /m <sup>3</sup> ) |
|-----|-----------------------------------------------------------------------------------------------------|------------------------------------------------------|-----------------|-------------------------------------------------|
| 0   | 2CH <sub>4</sub> -> C <sub>2</sub> H <sub>6</sub> + H <sub>2</sub>                                  | $r_0 = k_0 \cdot P_{CH_4}^2$                         | k <sub>0</sub>  | 9.51E-02                                        |
| 1   | C <sub>2</sub> H <sub>6</sub> -> C <sub>2</sub> H <sub>4</sub> + H <sub>2</sub>                     | $r_1 = k_1 \cdot P_{C_2H_6}$                         | k <sub>1</sub>  | 3.85E-01                                        |
| 2   | C <sub>2</sub> H <sub>4</sub> + H <sub>2</sub> -> C <sub>2</sub> H <sub>6</sub>                     | $r_2 = k_2 \cdot P_{C_2H_4} \cdot P_{H_2}$           | k <sub>2</sub>  | 1.96E-07                                        |
| 3   | 2CH <sub>4</sub> -> C <sub>2</sub> H <sub>4</sub> + 2H <sub>2</sub>                                 | $r_3 = k_3 \cdot P_{CH_4}^2$                         | k <sub>3</sub>  | 4.22E-02                                        |
| 4   | C <sub>2</sub> H <sub>4</sub> + 2H <sub>2</sub> -> 2CH <sub>4</sub>                                 | $r_4 = k_4 \cdot P_{C_2H_4} \cdot P_{H_2}^2$         | k <sub>4</sub>  | 1.71E-03                                        |
| 5   | C <sub>2</sub> H <sub>4</sub> -> C <sub>2</sub> H <sub>2</sub> + H <sub>2</sub>                     | $r_5 = k_5 \cdot P_{C_2H_4}$                         | k <sub>5</sub>  | 2.97E+00                                        |
| 6   | C <sub>2</sub> H <sub>4</sub> + CH <sub>4</sub> -> C <sub>3</sub> H <sub>8</sub>                    | $r_6 = k_6 \cdot P_{CH_4} \cdot P_{C_2H_4}$          | k <sub>6</sub>  | 2.48E+01                                        |
| 7   | C <sub>3</sub> H <sub>8</sub> -> C <sub>3</sub> H <sub>6</sub> + H <sub>2</sub>                     | $r_7 = k_7 \cdot P_{C_3H_8}$                         | k <sub>7</sub>  | 2.74E-01                                        |
| 8   | C <sub>3</sub> H <sub>6</sub> -> C <sub>2</sub> H <sub>2</sub> + CH <sub>4</sub>                    | $r_8 = k_8 \cdot P_{C_3H_6}$                         | k <sub>8</sub>  | 2.49E-10                                        |
| 9   | 2C <sub>2</sub> H <sub>4</sub> + H <sub>2</sub> -> C <sub>4</sub> H <sub>10</sub>                   | $r_9 = k_9 \cdot P_{C_2H_4}^2 \cdot P_{H_2}$         | k <sub>9</sub>  | 2.04E-02                                        |
| 10  | C <sub>3</sub> H <sub>8</sub> + CH <sub>4</sub> -> C <sub>4</sub> H <sub>10</sub> + H <sub>2</sub>  | $r_{10} = k_{10} \cdot P_{C_3H_8} \cdot P_{CH_4}$    | k <sub>10</sub> | 2.10E+00                                        |
| 11  | C <sub>4</sub> H <sub>10</sub> + CH <sub>4</sub> -> C <sub>5</sub> H <sub>12</sub> + H <sub>2</sub> | $r_{11} = k_{11} \cdot P_{C_4H_{10}} \cdot P_{CH_4}$ | k <sub>11</sub> | 7.49E+00                                        |

Table S3. Electron-impact reaction set considered in the kinetic derivation.

| Run | Reaction                                                                 | Category                  |
|-----|--------------------------------------------------------------------------|---------------------------|
| 0   | e+CH <sub>4</sub> -> e+CH <sub>4</sub>                                   | Elastic/momentum transfer |
| 1   | e+CH <sub>3</sub> -> e+CH <sub>3</sub>                                   |                           |
| 2   | e+CH <sub>2</sub> -> e+CH <sub>2</sub>                                   |                           |
| 3   | e+C <sub>2</sub> H <sub>6</sub> -> e+C <sub>2</sub> H <sub>6</sub>       |                           |
| 4   | e+C <sub>2</sub> H <sub>4</sub> -> e+C <sub>2</sub> H <sub>4</sub>       |                           |
| 5   | e+C <sub>2</sub> H <sub>2</sub> -> e+C <sub>2</sub> H <sub>2</sub>       |                           |
| 6   | e+C <sub>3</sub> H <sub>8</sub> -> e+C <sub>3</sub> H <sub>8</sub>       |                           |
| 7   | e+C <sub>3</sub> H <sub>6</sub> -> e+C <sub>3</sub> H <sub>6</sub>       | Vibrational excitation    |
| 8   | e+CH <sub>4</sub> <->e+CH <sub>4</sub> (v13)                             |                           |
| 9   | e+CH <sub>4</sub> <->e+CH <sub>4</sub> (v12)                             |                           |
| 10  | e+C <sub>2</sub> H <sub>6</sub> <->e+C <sub>2</sub> H <sub>6</sub> (v24) |                           |
| 11  | e+C <sub>2</sub> H <sub>6</sub> <->e+C <sub>2</sub> H <sub>6</sub> (v13) |                           |
| 12  | e+C <sub>2</sub> H <sub>4</sub> <->e+C <sub>2</sub> H <sub>4</sub> (v1)  |                           |
| 13  | e+C <sub>2</sub> H <sub>4</sub> <->e+C <sub>2</sub> H <sub>4</sub> (v2)  |                           |
| 14  | e+C <sub>2</sub> H <sub>2</sub> <->e+C <sub>2</sub> H <sub>2</sub> (v13) |                           |
| 15  | e+C <sub>2</sub> H <sub>2</sub> <->e+C <sub>2</sub> H <sub>2</sub> (v2)  |                           |

|       |                                       |                              |
|-------|---------------------------------------|------------------------------|
| 16    | $e+C_2H_2 \rightarrow e+C_2H_2(v_5)$  |                              |
| 17    | $e+C_3H_8 \rightarrow e+C_3H_8(v_1)$  |                              |
| 18    | $e+C_3H_8 \rightarrow e+C_3H_8(v_2)$  |                              |
| 19    | $e+C_3H_6 \rightarrow e+C_3H_6(v)$    |                              |
| <hr/> |                                       |                              |
| 20    | $e+CH_4 \rightarrow e+CH_3+H$         |                              |
| 21    | $e+CH_4 \rightarrow e+CH_2+H_2$       |                              |
| 22    | $e+CH_4 \rightarrow e+C+2H_2$         |                              |
| 23    | $e+C_2H_6 \rightarrow e+C_2H_4+H_2$   |                              |
| 24    | $e+C_2H_4 \rightarrow e+C_2H_2+H_2$   | Electron-impact dissociation |
| 25    | $e+C_2H_4 \rightarrow e+C_2H_3+H$     |                              |
| 26    | $e+C_3H_8 \rightarrow e+C_3H_6+H_2$   |                              |
| 27    | $e+C_3H_6 \rightarrow e+C_2H_2+CH_4$  |                              |
| <hr/> |                                       |                              |
| 28    | $e+CH_4 \rightarrow 2e+CH_4^+$        |                              |
| 29    | $e+CH_3 \rightarrow 2e+CH_3^+$        |                              |
| 30    | $e+C_2H_6 \rightarrow 2e+C_2H_6^+$    |                              |
| 31    | $e+C_2H_4 \rightarrow 2e+C_2H_4^+$    |                              |
| 32    | $e+C_2H_2 \rightarrow 2e+C_2H_2^+$    |                              |
| 33    | $e+C_3H_8 \rightarrow 2e+C_3H_8^+$    | Electron-impact ionization   |
| 34    | $e+C_3H_6 \rightarrow 2e+C_3H_6^+$    |                              |
| 35    | $e+C_2H_5^+ \rightarrow C_2H_2+H+H_2$ |                              |
| 36    | $e+C_2H_5^+ \rightarrow C_2H_3+2H$    |                              |
| 37    | $e+C_2H_5^+ \rightarrow C_2H_2+3H$    |                              |

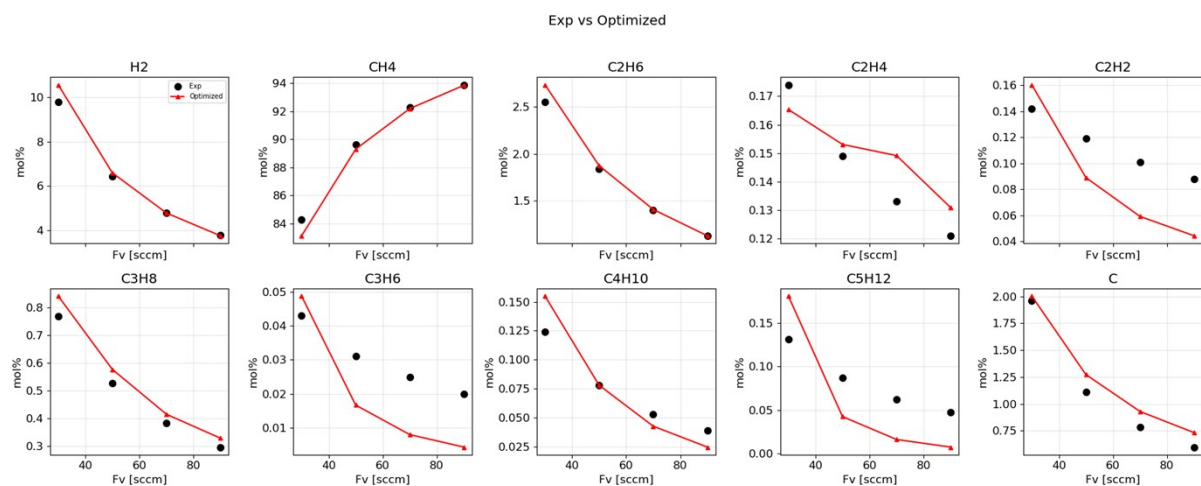

Fig S1. Comparison of experimental and predicted outlet compositions at different  $CH_4$  inflow rates.

## B. Feed gas composition

Table S4. Shale gas composition assumed in the present design.

| Components                     | Composition (% by volume) |
|--------------------------------|---------------------------|
| $\text{CH}_4$                  | 92.61                     |
| $\text{C}_2\text{H}_6$         | 3.78                      |
| $\text{C}_3\text{H}_8$         | 1.42                      |
| $\text{C}_4\text{H}_{10}$      | 0.04                      |
| iso- $\text{C}_4\text{H}_{10}$ | 0.02                      |
| $\text{C}_5\text{H}_{12}$      | 0.02                      |
| iso- $\text{C}_5\text{H}_{12}$ | 0.01                      |
| $\text{C}_6\text{H}_{14}$      | 0.01                      |
| $\text{N}_2$                   | 1.35                      |
| $\text{CO}_2$                  | 0.67                      |
| CO                             | 0.03                      |
| $\text{O}_2$                   | 0.03                      |
| $\text{H}_2\text{S}$           | 0.01                      |

### C. Heat integration result

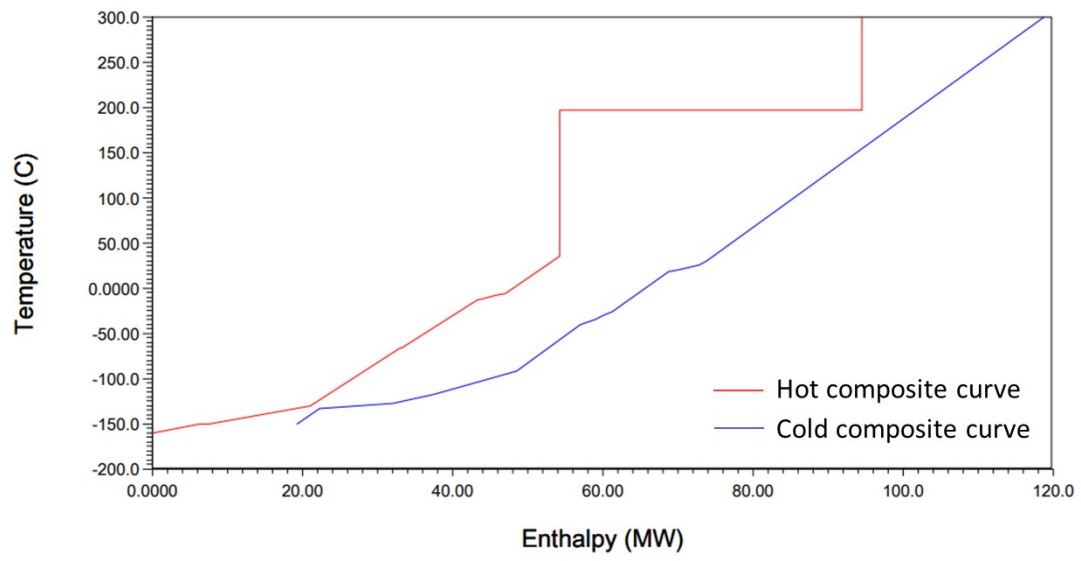

Fig S2. Composite curves for base case(On-site feed gas).

## D. Process stream and equipment information

Table S5. Process major stream information.

| Component                      | Unit    | 12     | RXN    | 16     | 17     | 18   | 21   | 24    | 28    | 13-2   | 30    | 31    |
|--------------------------------|---------|--------|--------|--------|--------|------|------|-------|-------|--------|-------|-------|
| H <sub>2</sub>                 | kmol/hr | -      | -      | 4914.8 | 4914.8 | 45.5 | 69.3 | -     | 118.9 | 57.9   | 0.1   | 57.9  |
| N <sub>2</sub>                 | kmol/hr | 5856   | 5856   | 5856   | 5856   | -    | 5856 | 2.6   | 3.4   | 3.4    | 0.2   | 3.4   |
| CO <sub>2</sub>                | kmol/hr | -      | -      | 3.3    | -      | -    | -    | 3.3   | 3.3   | 3.3    | -     | 3.3   |
| CO                             | kmol/hr | 2.3    | 2.3    | 37.8   | 37.8   | -    | -    | 37.8  | 37.8  | 37.8   | -     | 37.8  |
| C (Cokes)                      | kmol/hr | -      | -      | 1630.7 | -      | -    | -    | -     | -     | -      | -     | -     |
| CH <sub>4</sub>                | kmol/hr | 5497.6 | 4247.6 | 3316.8 | 3316.8 | -    | -    | 136.8 | 6.8   | 3336.8 | 0.1   | 1.8   |
| C <sub>2</sub> H <sub>2</sub>  | kmol/hr | -      | -      | 173.2  | 173.2  | -    | -    | 173.2 | 173.2 | -      | -     | -     |
| C <sub>2</sub> H <sub>4</sub>  | kmol/hr | -      | -      | 175    | 175    | -    | -    | 175   | 175   | 346.5  | 141.4 | 205.1 |
| C <sub>2</sub> H <sub>6</sub>  | kmol/hr | 224.9  | 224.9  | 63.6   | 63.6   | -    | -    | 63.6  | 63.6  | 65.3   | 1.2   | 65.3  |
| C <sub>3</sub> H <sub>8</sub>  | kmol/hr | 84.3   | 84.3   | 13.6   | 13.6   | -    | -    | 13.6  | 13.6  | 1.5    | -     | 13.6  |
| C <sub>4</sub> H <sub>10</sub> | kmol/hr | 2.3    | 2.3    | 1.8    | 1.8    | -    | -    | 1.8   | 1.8   | 0.5    | -     | 1.8   |
| C <sub>5</sub> +               | kmol/hr | 1.2    | 1.2    | 2.5    | 2.5    | -    | -    | 2.5   | 2.5   | 1.2    | -     | 2.5   |
| Olefins                        | kmol/hr | 1.2    | 1.2    | 24.9   | 24.9   | -    | -    | 24.9  | 24.9  | 24.9   | -     | 24.9  |

## E. Economic analysis

Table S6. List of major economic parameters and assumptions.

|                                                                  |        |
|------------------------------------------------------------------|--------|
| Shale gas prices (\$ per ton)                                    | 32.45  |
| Methane (off-site pipeline gas) price (\$ per ton) <sup>a</sup>  | 200.0  |
| Nitrogen (off-site pipeline gas) price (\$ per ton) <sup>a</sup> | 150.8  |
| Pd/WS <sub>2</sub> catalyst price (\$ per ton) <sup>c</sup>      | 58.8   |
| aMDEA price (\$ per ton) <sup>c</sup>                            | 3006.8 |
| Triethylene glycol price (\$ per ton) <sup>c</sup>               | 1200.9 |
| Alumina price (\$ per ton) <sup>c</sup>                          | 400.5  |
| Waste disposal (\$ per ton) <sup>b</sup>                         | 38.5   |
| Wastewater treatment chemical price (\$ per ton) <sup>e</sup>    | 5778.4 |
| Electricity price (\$ per kWh) <sup>e</sup>                      | 0.07   |
| Steam price (\$ per kWh) <sup>f</sup>                            | 0.04   |
| Discount rate (%)                                                | 10.0   |
| Plant financing by equity (%) <sup>e</sup>                       | 40.0   |
| Plant life (years) <sup>e</sup>                                  | 30.0   |
| Income tax rate (%) <sup>e</sup>                                 | 35.0   |
| Interest rate for debt financing (%) <sup>e</sup>                | 8.0    |
| Term for debt financing (years) <sup>e</sup>                     | 10.0   |
| General plant depreciation (years) <sup>e</sup>                  | 7.0    |
| Working capital (% of fixed capital investment) <sup>e</sup>     | 5.0    |
| On-stream percentage after startup (%) <sup>e</sup>              | 90.0   |
| Startup time (years) <sup>e</sup>                                | 0.25   |
| Revenue and costs during startup                                 |        |
| Revenue (% of normal) <sup>e</sup>                               | 50.0   |
| Variable costs (% of normal) <sup>e</sup>                        | 75.0   |
| Fixed costs (% of normal) <sup>e</sup>                           | 100.0  |
| Construction period (years) <sup>e</sup>                         | 3.0    |
| First 12 months' expenditures (%) <sup>e</sup>                   | 8.0    |
| Next 12 months' expenditures (%) <sup>e</sup>                    | 60.0   |
| Last 12 months' expenditures (%) <sup>e</sup>                    | 32.0   |
| <sup>a</sup> Taken from Humbird et al. (2011)                    |        |
| <sup>b</sup> Taken from Davis et al. (2018)                      |        |
| <sup>c</sup> Taken from Liu et al. (2015)                        |        |
| <sup>d</sup> Taken from Kazi et al. (2010)                       |        |
| <sup>e</sup> Taken from Davis et al. (2015)                      |        |
| <sup>f</sup> Taken from Motagamwala et al. (2018)                |        |

## F. First-of-a-Kind (FOAK) plant analysis

Table S7. Parameters and equations used in pioneer plant analysis.

| Parameter                            | Definition                                                                                                         | Range    | Value |
|--------------------------------------|--------------------------------------------------------------------------------------------------------------------|----------|-------|
| <b>Plant performance<sup>a</sup></b> |                                                                                                                    | 0–89     | 25    |
|                                      | $= g(\text{process maturity, op}$<br>$\times \text{BALEQS} - 4.12 \times \text{WASTE}$                             |          |       |
| NEWSTEPS                             | Number of new process steps based on block                                                                         | $\geq 0$ | 3     |
| BALEQS <sup>a</sup>                  | Percentage of heat and mass balance equations based on actual prior plant data                                     | 0–100    | 20    |
| WASTE <sup>b</sup>                   | Factor for waste handling encountered during development                                                           | 0–5      | 2     |
| SOLIDS <sup>b</sup>                  | Factor for presence of solid feedstock or products                                                                 | 0 or 1   | 1     |
| <b>Cost growth</b>                   |                                                                                                                    | >0       | 0.52  |
|                                      | $= f(\text{technology complexit}$<br>$- 0.02125 \times \text{IMPURITIES}$<br>$- 0.06361 \times \text{PROJECT DEF}$ |          |       |
| PCTNEW                               | Estimate (%) of unproven technology incorporated in commercial use                                                 | 0–100    | 40    |
| IMPURITIES <sup>c</sup>              | Factor for impurities present in process                                                                           | 0–5      | 2     |
| COMPLEXITY <sup>d</sup>              | Block count of all process steps in plant                                                                          | $\geq 1$ | 6     |
| INCLUSIVENESS <sup>c</sup>           | Percentage of three factors: pre-startup personnel costs, pre-startup inventory cost, and land purchase            | 0–100    | 100   |
| PROJECT DEFINITION <sup>d</sup>      | Levels of site-specific information and engineering included in estimate                                           | 2–8      | 7     |
| <sup>a</sup>                         | Taken from Rubin et al. (2021)                                                                                     |          |       |
| <sup>b</sup>                         | Taken from Baccharini (2006)                                                                                       |          |       |
| <sup>c</sup>                         | Taken from Jia et al. (2010)                                                                                       |          |       |
| <sup>d</sup>                         | Taken from Loose et al. (2024)                                                                                     |          |       |

## G. Project cost

Table S8. Result of project cost calculation.

| Areas                                 | Installed cost (\$)      |
|---------------------------------------|--------------------------|
| Acid gas removal                      | 35,393,754               |
| TEG dehydration                       | 2,108,810                |
| Plasma reaction                       | 14,337,491               |
| PSA                                   | 16,873,696               |
| LPG separation                        | 4,556,420                |
| Ethylene production                   | 2,347,876                |
| <b>ISBL (inside battery limits)</b>   | <b>75,618,046</b>        |
| Wastewater treatment                  | 1,968,330                |
| Storage                               | 2,906,965                |
| Heat and power generation             | 134,630,108              |
| Utilities                             | 38,060,602               |
| <b>OSBL (outside battery limits)</b>  | <b>177,566,005</b>       |
| <b>Total installed equipment</b>      | <b>253,184,051</b>       |
| Warehouse                             | 4% of ISBL<br>3,024,722  |
| Site development                      | 9% of ISBL<br>6,805,624  |
| Additional piping                     | 5% of ISBL<br>3,780,902  |
| <b>TDC (total direct costs)</b>       | <b>266,795,299</b>       |
| Prorateable expenses                  | 10% of TDC<br>26,679,530 |
| Field expenses                        | 10% of TDC<br>26,679,530 |
| Home office & construction fee        | 20% of TDC<br>53,359,060 |
| Project contingency                   | 10% of TDC<br>26,679,530 |
| Other costs (start-up, permits, etc)  | 10% of TDC<br>26,679,530 |
| <b>TIC (total indirect costs)</b>     | <b>160,077,179</b>       |
| <b>FCI (fixed capital investment)</b> | <b>456,660,152</b>       |
| Land                                  | 2% of FCI<br>9,133,203   |
| Working capital                       | 5% of FCI<br>22,833,008  |
| <b>TCI (total capital investment)</b> | <b>488,626,362</b>       |

Table S9. Detailed equipment cost basis for major process units.

| Section             | Equipment / service                                             | Design basis or sizing basis          | Base capacity or flow (kg/h) | Actual capacity or flow (kg/h) | Scaling exponent | Purchased cost, base year (\$) | Base year | Purchased cost, project year (\$) | Installation factor | Installed cost, project year (\$) |
|---------------------|-----------------------------------------------------------------|---------------------------------------|------------------------------|--------------------------------|------------------|--------------------------------|-----------|-----------------------------------|---------------------|-----------------------------------|
| Acid gas removal    | AGRU                                                            | Feed gas throughput                   | 223,000                      | 407,349                        | 0.6              | 13,127,000                     | 2018      | 22,121,096                        | 1.6                 | 35,393,754                        |
| TEG dehydration     | TEG unit                                                        | Dehydration gas throughput            | 1,055.7                      | 276,385.8                      | 0.7              | 21,400                         | 2021      | 1,054,405                         | 2.0                 | 2,108,810                         |
| LPG separation      | Demethanizer                                                    | Hydrocarbon separation train          | 416,544                      | 41,440                         | 0.6              | 1,450,000                      | 2020      | 453,764                           | 1.6                 | 726,023                           |
|                     | Deethanizer                                                     | Hydrocarbon separation train          | 416,544                      | 41,440                         | 0.6              | 1,200,000                      | 2020      | 375,529                           | 1.6                 | 600,847                           |
|                     | Debutanizer                                                     | Hydrocarbon separation train          | 416,544                      | 41,440                         | 0.6              | 1,000,000                      | 2020      | 312,941                           | 1.6                 | 500,705                           |
|                     | Cryogenic compressor                                            | Hydrocarbon separation train          | 416,544                      | 41,440                         | 0.6              | 2,750,000                      | 2020      | 860,588                           | 1.6                 | 1,376,940                         |
|                     | Heat exchanger                                                  | Hydrocarbon separation train          | 416,544                      | 41,440                         | 0.6              | 800,000                        | 2020      | 250,353                           | 1.6                 | 400,564                           |
|                     | Refrigeration system                                            | Hydrocarbon separation train          | 416,544                      | 41,440                         | 0.6              | 1,900,000                      | 2020      | 594,588                           | 1.6                 | 951,341                           |
| Ethylene production | Fixed-bed reactor                                               | Hydrogenation section throughput      | 5,600                        | 504.2                          | 0.6              | 1,200,000                      | 2025      | 283,032                           | 2.2                 | 622,669                           |
|                     | Pd-Ag/ $\alpha$ -Al <sub>2</sub> O <sub>3</sub> catalyst system | Hydrogenation section throughput      | 5,600                        | 504.2                          | 0.6              | 400,000                        | 2025      | 94,344                            | 1.5                 | 141,516                           |
|                     | Feed preheater                                                  | Hydrogenation section throughput      | 5,600                        | 504.2                          | 0.6              | 150,000                        | 2025      | 35,379                            | 2.2                 | 77,834                            |
|                     | Intercooler                                                     | Hydrogenation section throughput      | 5,600                        | 504.2                          | 0.6              | 120,000                        | 2025      | 28,303                            | 2.2                 | 62,267                            |
|                     | Hydrogen compressor                                             | Hydrogenation section throughput      | 5,600                        | 504.2                          | 0.6              | 300,000                        | 2025      | 70,758                            | 2.3                 | 162,743                           |
|                     | Gas chromatograph                                               | Hydrogenation section throughput      | 5,600                        | 504.2                          | 0.6              | 250,000                        | 2025      | 58,965                            | 1.8                 | 106,137                           |
|                     | Control system (APC)                                            | Hydrogenation section throughput      | 5,600                        | 504.2                          | 0.6              | 500,000                        | 2025      | 117,930                           | 1.5                 | 176,895                           |
|                     | Pressure relief system                                          | Hydrogenation section throughput      | 5,600                        | 504.2                          | 0.6              | 100,000                        | 2025      | 23,586                            | 2.0                 | 47,172                            |
|                     | C <sub>2</sub> H <sub>4</sub> -PSA                              | Hydrogenation section throughput      | 5,600                        | 504.2                          | 1.0              | 1,200,000                      | 2025      | 108,045                           | 2.2                 | 237,699                           |
|                     | Packaged auxiliaries and controls                               | Integrated ethylene finishing package | -                            | -                              | -                | -                              | 2021      | 396,080                           | 1.8                 | 712,944                           |
| Wastewater          | Neutralization +                                                | Wastewater flow                       | 100,000                      | 13,220                         | 0.6              | 800,000                        | 2011      | 302,820                           | 1.6                 | 484,512                           |

|           |                      |                            |         |        |     |           |      |         |     |         |
|-----------|----------------------|----------------------------|---------|--------|-----|-----------|------|---------|-----|---------|
| treatment | settler              |                            |         |        |     |           |      |         |     |         |
|           | Organic removal (UF) | Wastewater flow            | 100,000 | 13,220 | 0.6 | 950,000   | 2011 | 359,599 | 1.6 | 575,358 |
|           | RO + polishing unit  | Wastewater flow            | 100,000 | 13,220 | 0.6 | 1,500,000 | 2011 | 567,788 | 1.6 | 908,460 |
| Storage   | LPG storage tank     | Product storage throughput | 416,544 | 41,440 | 0.6 | 1,200,000 | 2020 | 375,529 | 2.0 | 751,058 |







## I. Life-cycle assessment

Table S11. LCA data of shale gas-to-ethylene process

| Input                                                                          | Amount | Unit | Database      |
|--------------------------------------------------------------------------------|--------|------|---------------|
| Methane, high pressure (pipeline grade) {GLO}, 2022/kg/RNA                     | 3.002  | kg   | ecoinvent 3.6 |
| Nitrogen, liquid {GLO}  market for   Cut-off, U                                | 2.099  | kg   | ecoinvent 3.6 |
| Pd/WS <sub>2</sub> catalyst (1 wt% Pd)  market group for   Cut-off, U          | 0.102  | kg   | ecoinvent 3.6 |
| Triethylene glycol (TEG), virgin {GLO}  market for   Cut-off, U                | 0.015  | kg   | ecoinvent 3.6 |
| aMDEA (45 wt% aqueous solution), {GLO}  Cut-off, U                             | 0.008  | kg   | ecoinvent 3.6 |
| Alumina, activated {GLO} /kg/RNA                                               | 0.019  | kg   | ecoinvent 3.6 |
| Enzyme, Cellulase, Novozyme Celluclast/kg/RER                                  | 0.223  | kg   | ecoinvent 3.6 |
| Heat, district or industrial, natural gas {GLO}  market group for   Cut-off, U | 29.957 | MJ   | ecoinvent 3.6 |
| Electricity, medium voltage {GLO}  market group for   Cut-off, U               | 5.405  | MJ   | ecoinvent 3.6 |
| Output                                                                         |        |      |               |
| Ethylene, polymer grade                                                        | 1.000  | kg   | ecoinvent 3.6 |
| Carbon dioxide, biogenic                                                       | 0.337  | kg   | ecoinvent 3.6 |
| Carbon black                                                                   | 0.076  | kg   | ecoinvent 3.6 |
| Vent gas (light ends)                                                          | 1.041  | kg   | ecoinvent 3.6 |
| Water                                                                          | 3.404  | kg   | ecoinvent 3.6 |
| Dummy_Disposal, solid waste, unspecified, to unspecified landfill/kg/RNA       | 1.848  | kg   | USLCI         |

## J. Sensitivity of pretreatment burden to shale gas composition variability

Table S12. Impact of shale gas compositions on the process economics.

|                           | Raw shale gas CH <sub>4</sub> (mol%) | Relative AGR + TEG cost | Estimated MSP change (%) | Estimated MSP (\$/ton C <sub>2</sub> H <sub>4</sub> ) |
|---------------------------|--------------------------------------|-------------------------|--------------------------|-------------------------------------------------------|
| Low-CH <sub>4</sub> case  | 87.61                                | 1.08                    | 1.44                     | 916.41                                                |
| Base case                 | 92.61                                | 1.00                    | 0.00                     | 903.40                                                |
| High-CH <sub>4</sub> case | 97.61                                | 0.96                    | -0.72                    | 896.90                                                |

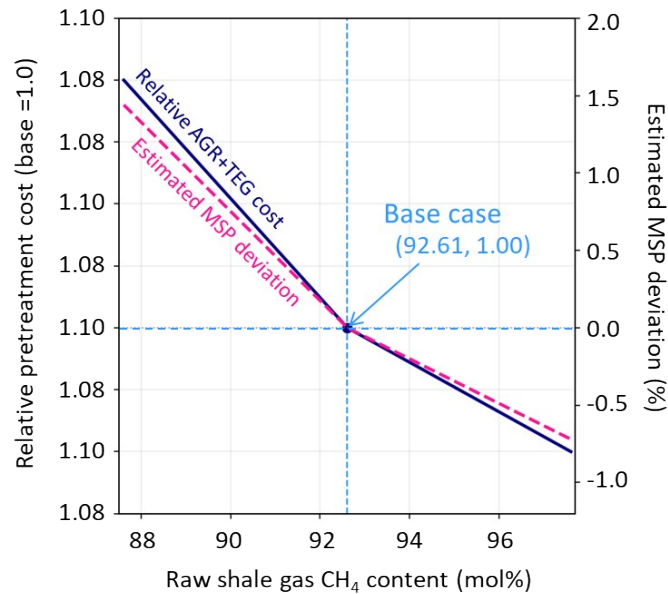

Fig S3. Sensitivity of pretreatment cost and propagated MSP to raw shale gas methane content.

To provide a quantitative indication of the potential economic effect of shale gas composition variability, a simple literature-informed sensitivity analysis was performed for the upstream pretreatment section. In the base design, the raw shale gas contains 92.61 mol% CH<sub>4</sub> and is conditioned through acid gas removal (AGR) and TEG dehydration prior to entering the plasma reactor. Because the reactor feed is defined after purification, variations in the raw shale gas composition are expected to affect primarily the pretreatment burden rather than the plasma reaction model or the downstream separation section itself. Previous shale gas processing studies have shown that raw gas composition variability can alter the burden of upstream treatment systems depending on methane content and impurity levels (He and You, 2014). In addition, dehydration studies have reported that higher acid gas content increases the water content of the treated gas and solvent losses, thereby increasing the burden of the TEG dehydration section (Perić et al., 2019), whereas the overall sensitivity of TEG systems is reflected mainly in operating burden rather than major changes in capital cost (Petropoulou et al., 2019).

Based on these observations, the methane content of the raw shale gas was varied by  $\pm 5$  mol% around the base composition, and the relative AGR + TEG pretreatment cost was conservatively varied from 0.96 to 1.08. The resulting propagated effect on the minimum selling price (MSP) was estimated using the pretreatment cost share in the overall process cost breakdown. As shown in Fig. S3, the relative pretreatment cost increases as the methane content of the raw shale gas decreases, while the corresponding MSP deviation remains limited. Across the examined range, the estimated MSP varies from  $-0.72\%$  to  $+1.44\%$  relative to the base-case MSP of  $\$903.4/\text{ton C}_2\text{H}_4$ . These results suggest that shale gas composition variability can influence the upstream conditioning burden, but its contribution to the overall process economics remains secondary relative to the dominant cost drivers considered in the main uncertainty analysis.

## References

- Li H, Wu C, Zhang Q, Li X, Gao X. Synthesis of 1, 3-dioxolane from aqueous formaldehyde solution and ethylene glycol: kinetics and reactive distillation. *Industrial & Engineering Chemistry Research* 2019;58(17);7025-7036.
- Davis, R., Tao, L., Scarlata, C., Tan, E.C.D., Ross, J., Lukas, J., Sexton, D., 2015. Process Design and Economics for the Conversion of Lignocellulosic Biomass to Hydrocarbons: Dilute-Acid and Enzymatic Deconstruction of Biomass to Sugars and Catalytic Conversion of Sugars to Hydrocarbons. <https://doi.org/10.2172/1176746>
- Davis, R.E., Grundl, N.J., Tao, L., Bidy, M.J., Tan, E.C., Beckham, G.T., Humbird, D., Thompson, D.N., Roni, M.S., 2018. Process Design and Economics for the Conversion of Lignocellulosic Biomass to Hydrocarbon Fuels and Coproducts: 2018 Biochemical Design Case Update; Biochemical Deconstruction and Conversion of Biomass to Fuels and Products via Integrated Biorefinery Pathways. <https://doi.org/10.2172/1483234>
- Humbird, D., Davis, R., Tao, L., Kinchin, C., Hsu, D., Aden, A., Schoen, P., Lukas, J., Olthof, B., Worley, M., Sexton, D., Dudgeon, D., 2011. Process Design and Economics for Biochemical Conversion of Lignocellulosic Biomass to Ethanol: Dilute-Acid Pretreatment and Enzymatic Hydrolysis of Corn Stover.
- Rubin, E. S., et al. (2021). Cost guidelines for advanced energy systems: Learning curves and FOAK costs. Proceedings of the 15th Greenhouse Gas Control Technologies Conference.
- Baccarini, D. (2006). Merrow & Schroeder (1991) highlighted the important link between predicting cost growth... and project cost contingency by stating that cost growth can be viewed as inadequate contingency within cost estimates. In Proceedings of the AUBEA Conference. Curtin University.
- Jia, G., Ni, J., Chen, Z., Hong, B., & Lin, C. (2010). A project contingency framework based on uncertainty and its application to chemical plant projects. *Journal of Loss Prevention in the Process Industries*, 23(5), 635-642.
- Loose, V. W., & Roark, J. (2024). Progressing from first-of-a-kind to Nth-of-a-kind: Applying learning rates and contingency factors. *Journal of Process Safety and Environmental Protection*, 185, 883-894.
